# Supplementary material for: Neuropilins as potential biomarkers in hepatocellular carcinoma: a systematic review of basic and clinical implications
Source: PubMed Central journal article supplement — Clin Mol Hepatol. 2023 Feb 1;29(2):293–319. doi: 10.3350/cmh.2022.0425 (PMC10121286; doi:10.3350/cmh.2022.0425), 2023-02-01
Supplement: cmh-2022-0425-Supplementary-Fig-1.pdf [file cmh-2022-0425-Supplementary-Fig-1.pdf]

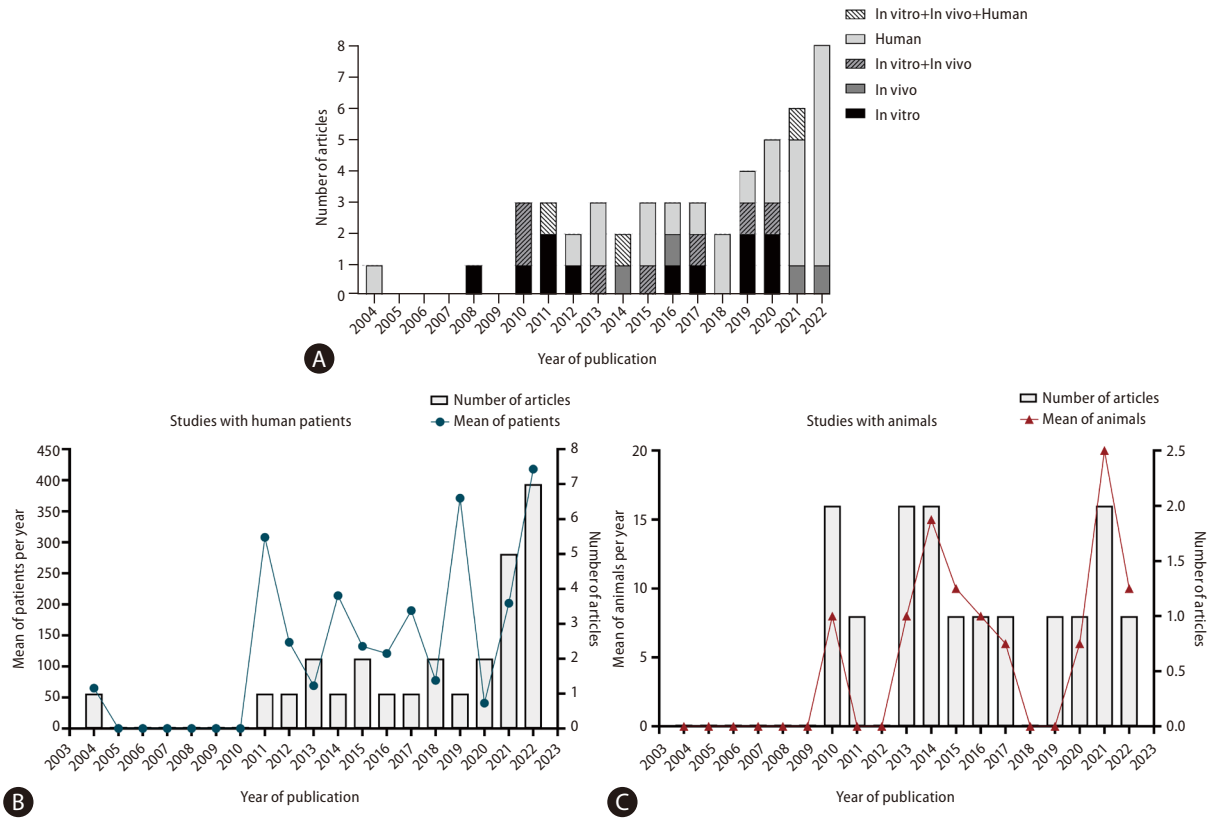

**Supplementary Figure 1.** Evaluation of the published articles. (A) Temporal distribution of the number of articles published employing in vitro, in vivo or human models, or a combination of them. Comparison of the number of studies conducted with (B) human or (C) animal models with the mean of the human or animals examined per year, respectively.
