# Supplementary material for: Neuropilins as potential biomarkers in hepatocellular carcinoma: a systematic review of basic and clinical implications
Source: PubMed Central journal article supplement — Clin Mol Hepatol. 2023 Feb 1;29(2):293–319. doi: 10.3350/cmh.2022.0425 (PMC10121286; doi:10.3350/cmh.2022.0425), 2023-02-01
Supplement: cmh-2022-0425-Supplementary-Table-2.pdf [file cmh-2022-0425-Supplementary-Table-2.pdf]

**Supplementary Table 2.** PRISMA 2020 for abstracts checklist

| Section and Topic       | Item # | Checklist item                                                                                                                                                                                                                                                                                         | Location where item is reported |
|-------------------------|--------|--------------------------------------------------------------------------------------------------------------------------------------------------------------------------------------------------------------------------------------------------------------------------------------------------------|---------------------------------|
| <b>TITLE</b>            |        |                                                                                                                                                                                                                                                                                                        |                                 |
| Title                   | 1      | Identify the report as a systematic review.                                                                                                                                                                                                                                                            | Yes                             |
| <b>BACKGROUND</b>       |        |                                                                                                                                                                                                                                                                                                        |                                 |
| Objectives              | 2      | Provide an explicit statement of the main objective(s) or question(s) the review addresses.                                                                                                                                                                                                            | Yes                             |
| <b>METHODS</b>          |        |                                                                                                                                                                                                                                                                                                        |                                 |
| Eligibility criteria    | 3      | Specify the inclusion and exclusion criteria for the review.                                                                                                                                                                                                                                           | No                              |
| Information sources     | 4      | Specify the information sources (e.g., databases, registers) used to identify studies and the date when each was last searched.                                                                                                                                                                        | Yes                             |
| Risk of bias            | 5      | Specify the methods used to assess risk of bias in the included studies.                                                                                                                                                                                                                               | No                              |
| Synthesis of results    | 6      | Specify the methods used to present and synthesise results.                                                                                                                                                                                                                                            | Yes                             |
| <b>RESULTS</b>          |        |                                                                                                                                                                                                                                                                                                        |                                 |
| Included studies        | 7      | Give the total number of included studies and participants and summarise relevant characteristics of studies.                                                                                                                                                                                          | Yes                             |
| Synthesis of results    | 8      | Present results for main outcomes, preferably indicating the number of included studies and participants for each. If meta-analysis was done, report the summary estimate and confidence/credible interval. If comparing groups, indicate the direction of the effect (i.e., which group is favoured). | Yes                             |
| <b>DISCUSSION</b>       |        |                                                                                                                                                                                                                                                                                                        |                                 |
| Limitations of evidence | 9      | Provide a brief summary of the limitations of the evidence included in the review (e.g., study risk of bias, inconsistency and imprecision).                                                                                                                                                           | No                              |
| Interpretation          | 10     | Provide a general interpretation of the results and important implications.                                                                                                                                                                                                                            | Yes                             |
| <b>OTHER</b>            |        |                                                                                                                                                                                                                                                                                                        |                                 |
| Funding                 | 11     | Specify the primary source of funding for the review.                                                                                                                                                                                                                                                  | No                              |
| Registration            | 12     | Provide the register name and registration number.                                                                                                                                                                                                                                                     | Yes                             |
