# Supplementary material for: Neuropilins as potential biomarkers in hepatocellular carcinoma: a systematic review of basic and clinical implications
Source: PubMed Central journal article supplement — Clin Mol Hepatol. 2023 Feb 1;29(2):293–319. doi: 10.3350/cmh.2022.0425 (PMC10121286; doi:10.3350/cmh.2022.0425), 2023-02-01
Supplement: cmh-2022-0425-Supplementary-Table-3.pdf [file cmh-2022-0425-Supplementary-Table-3.pdf]

**Supplementary Table 3.** Full search strategy employed for each online database (up to and including August 31st, 2022)

| DATABASE                       | SEARCH STRATEGY                                                                                                                                                                                                                                                                                                                                                                                                                                                                                                                                                                                                                                                                                                          |
|--------------------------------|--------------------------------------------------------------------------------------------------------------------------------------------------------------------------------------------------------------------------------------------------------------------------------------------------------------------------------------------------------------------------------------------------------------------------------------------------------------------------------------------------------------------------------------------------------------------------------------------------------------------------------------------------------------------------------------------------------------------------|
| PubMed                         | <p>(“nrp1”[All Fields] OR “nrp-1”[All Fields] OR “nrp 1”[All Fields] OR “neuropilin 1”[All Fields] OR “neuropilin-1”[All Fields] OR “CD304”[All Fields] OR “VEGF165R”[All Fields] OR “Vascular endothelial cell growth factor 165 receptor”[All Fields] OR “BDCA4”[All Fields] OR “neuropilin”[All Fields] OR “nrp”[All Fields] OR “nrp-2”[All Fields] OR “nrp 2”[All Fields] OR “neuropilin-2”[All Fields] OR “neuropilin 2”[All Fields] OR “VEGF165R2”[All Fields] OR “Vascular endothelial cell growth factor 165 receptor 2”[All Fields] OR “np2”[All Fields] OR “nnp2”[All Fields] OR “pro2714”[All Fields]) AND (“hepatocellular carcinoma”[All Fields] OR “hepatocarcinoma”[All Fields] OR “HCC”[All Fields])</p> |
| Scopus                         | <p>TITLE-ABS-KEY (( “nrp1” OR “nrp-1” OR “nrp 1” OR “nrp1” OR “neuropilin 1” OR “neuropilin-1” OR “CD304” OR “VEGF165R” OR “Vascular endothelial cell growth factor 165 receptor” OR “BDCA4” OR “neuropilin” OR “nrp” OR “nrp-2” OR “nrp 2” OR “nrp2” OR “neuropilin-2” OR “neuropilin 2” OR “VEGF165R2” OR “Vascular endothelial cell growth factor 165 receptor 2” OR “np2” OR “nnp2” OR “pro2714”) AND (“hepatocellular carcinoma” OR “hepatocarcinoma” OR “HCC” ) )</p>                                                                                                                                                                                                                                              |
| Web of Science Core Collection | <p>TS=( (“nrp1” OR “nrp-1” OR “nrp 1” OR “nrp1” OR “neuropilin 1” OR “neuropilin-1” OR “CD304” OR “VEGF165R” OR “Vascular endothelial cell growth factor 165 receptor” OR “BDCA4” OR “neuropilin” OR “nrp” OR “nrp-2” OR “nrp 2” OR “nrp2” OR “neuropilin-2” OR “neuropilin 2” OR “VEGF165R2” OR “Vascular endothelial cell growth factor 165 receptor 2” OR “np2” OR “nnp2” OR “pro2714”) AND (“hepatocellular carcinoma” OR “hepatocarcinoma” OR “HCC”) )</p> <p><i>Indexes=SCI-EXPANDED, SSCI, A&amp;HCI, CPCI-S, CPCI-SSH, BKCI-S, BKCI-SSH, ESCI, CCR-EXPANDED, IC</i></p> <p><i>Timespan=All years</i></p>                                                                                                         |
| Excerpta Medica Database       | <p>(“nrp1” OR “nrp-1” OR “nrp 1” OR “nrp1” OR “neuropilin 1” OR “neuropilin-1” OR “CD304” OR “VEGF165R” OR “Vascular endothelial cell growth factor 165 receptor” OR “BDCA4” OR “neuropilin” OR “nrp” OR “nrp-2” OR “nrp 2” OR “nrp2” OR “neuropilin-2” OR “neuropilin 2” OR “VEGF165R2” OR “Vascular endothelial cell growth factor 165 receptor 2” OR “np2” OR “nnp2” OR “pro2714”) AND (“hepatocellular carcinoma” OR “hepatocarcinoma” OR “HCC” )</p>                                                                                                                                                                                                                                                                |
| Cochrane Library               | <p>(“nrp1” OR “nrp-1” OR “nrp 1” OR “nrp1” OR “neuropilin 1” OR “neuropilin-1” OR “CD304” OR “VEGF165R” OR “Vascular endothelial cell growth factor 165 receptor” OR “BDCA4” OR “neuropilin” OR “nrp” OR “nrp-2” OR “nrp 2” OR “nrp2” OR “neuropilin-2” OR “neuropilin 2” OR “VEGF165R2” OR “Vascular endothelial cell growth factor 165 receptor 2” OR “np2” OR “nnp2” OR “pro2714”) AND (“hepatocellular carcinoma” OR “hepatocarcinoma” OR “HCC” ) ;ti,ab, kw</p>                                                                                                                                                                                                                                                     |
